# Supplementary material for: Prediction of DNA Repair Inhibitor Response in Short-Term Patient-Derived Ovarian Cancer Organoids
Source: Oxford University Press journal article supplement (doi:10.1158/2159-8290.cd-18-0474), 2018-09-13
Supplement: 21598290cd180474-sup-201018_2_supp_4992272_p35332.xlsx [file 21598290cd180474-sup-201018_2_supp_4992272_p35332.xlsx]

## Sheet: Sample_Metrics_view_crosstab
Supplementary Table S1. WES metrics.
Subject	Sample ID	Sample Type	Contamination %	Mean Bait Coverage (HS)	Mean Target Coverage (HS)	PF Reads	PF Reads Aligned (Paired)	PF Unique Reads (HS)	PF Unique Reads Aligned (HS)	Reads Aligned in Pairs	Sample Coverage
DF-17-103	DF-17-103_Omentum_C_T	Tumor	0.87	205.69	125.84	234613692	229507199	208405341	203298848	227228856	0.86
DF-17-103	DF-17-103_Omentum_F_T	Tumor	2.13	198.95	124.4	217336720	213189378	193750346	189603004	211129628	0.84
DF-17-103	DF-17-103_Uterus_3_N	Normal	0.01	368.55	185.85	339659586	332951974	258295362	251587750	329757960	0.91
DF-17-104	DF-17-104_omentum_C_T	Tumor	3.94	430.64	244.51	447150632	439154109	350932137	342935614	435260634	0.94
DF-17-104	DF-17-104_omentum_F_T	Tumor	0	494.15	278.7	489105846	482819384	385514869	379228407	480147276	0.95
DF-17-104	DF-17-104_right_fimbria_F_N	Normal	0	130.05	82.56	147304752	144289270	130715543	127700061	142884984	0.93
DF-17-107	DF-17-107_left_ovary_C_T	Tumor	0	370.86	208.01	355456026	349241706	282552734	276338414	345960158	0.93
DF-17-107	DF-17-107_right_ovary_C_T	Tumor	0	331.85	188.38	333870418	327150358	273114591	266394531	323887240	0.93
DF-17-107	DF-17-107_omentum_C_T	Tumor	0	421.14	237.32	414057216	407759485	331150199	324852468	404852538	0.94
DF-17-107	DF-17-107_left_ovary_F_T	Tumor	0.01	456.65	262.29	465852188	458105259	366368793	358621864	453691234	0.95
DF-17-107	DF-17-107_right_ovary_F_T	Tumor	0.02	431.41	237.21	439685424	432263975	341787611	334366162	428391954	0.94
DF-17-107	DF-17-107_omentum_F_T	Tumor	0	484.8	274.49	516715844	508507060	407972134	399763350	504382176	0.95
DF-17-107	DF-17-107_right_fimbria_F_N	Normal	0.02	105.3	70.83	132976036	130760812	123372700	121157476	129863110	0.92
DF-17-115	DF-17-115_Left_ovary_mass_C_T	Tumor	3.69	384.45	216.83	388173594	380162374	313391145	305379925	376165408	0.92
DF-17-115	DF-17-115_Left_ovarian_mass_F_T	Tumor	3.98	473.43	266.38	467108646	460425726	364613895	357930975	457036134	0.94
DF-17-115	DF-17-115_WB_N	Normal	0	132.63	83	177713834	174434511	155477787	152198464	173307252	0.93
DF-17-116	DF-17-116_omental_met_C_T	Tumor	0.2	421.46	228.15	393239826	386155646	303657953	296573773	382552792	0.94
DF-17-116	DF-17-116_omentum_metastasis_F_T	Tumor	0	544.18	298.75	568096074	558953855	431882775	422740556	554214716	0.95
DF-17-116	DF-17-116_WB_N	Normal	0	110.26	70.79	143984584	141542604	129435913	126993933	140651376	0.92
DF-17-121	DF-17-121_pleural_effusion_C_T	Tumor	3.06	454.41	254.06	463235080	455782674	360849521	353397115	451779302	0.94
DF-17-121	DF-17-121_pleural_effusion_F_T	Tumor	1.11	483.29	273.58	509746426	500608299	408599215	399461088	495759720	0.95
DF-17-121	DF-17-121_WB_N	Normal	0.03	128.07	85.29	176294610	173370898	159351397	156427685	172222060	0.94
DF-17-123	DF-17-123_Right_ovary_C_T	Tumor	0	193.89	120.81	210984740	206109493	187383424	182508177	203409274	0.87
DF-17-123	DF-17-123_Left_ovary_C_T	Tumor	0	199.31	124.56	226091800	221014139	200355077	195277416	218719048	0.87
DF-17-123	DF-17-123_Omentum_C_T	Tumor	0	245.43	148.16	292706982	285005982	255631563	247930563	281497948	0.91
DF-17-123	DF-17-123_Right_ovary_F_T	Tumor	0	200.73	125.18	236773014	231012027	211485152	205724165	228135142	0.87
DF-17-123	DF-17-123_Left_ovary_F_T	Tumor	3.1	238.24	147.73	282513042	277088546	247463774	242039278	274714040	0.86
DF-17-123	DF-17-123_Omentum_F_T	Tumor	0.01	220.74	136.82	226063218	222033649	199845519	195815950	219914886	0.87
DF-17-123	DF-17-123_WB_N	Normal	0	128.3	81.8	169577932	166739219	150965791	148127078	165688510	0.93
DF-17-126	DF-17-126_omentum_C_T	Tumor	0.18	394.47	225.83	415093292	408209059	338736183	331851950	405187764	0.94
DF-17-126	DF-17-126_omental_metastasis_F_T	Tumor	0.15	523.73	279.92	568901558	557877028	430241261	419216731	552103638	0.95
DF-17-126	DF-17-126_WB_N	Normal	0	108.45	70.73	146075454	143407963	131546368	128878877	142381942	0.92
DF-17-132	DF-17-87-132_Omentum_C_T	Tumor	2.45	354.62	198.02	344034244	337801941	277620472	271388169	334897556	0.92
DF-17-132	DF-17-132_omentum_C_T	Tumor	0	391.12	219.05	359585744	354064195	290218630	284697081	351653982	0.93
DF-17-132	DF-17-132_cecum_C_T	Tumor	0.01	353.03	199.27	387173802	380975440	306579004	300380642	378468802	0.94
DF-17-132	DF-17-87-132_Omentum_F_T	Tumor	1.84	467.78	268.33	449152816	443458810	355029350	349335344	440713308	0.94
DF-17-132	DF-17-132_Omentum_F_T	Tumor	0.03	359.7	209.64	374836070	368511349	303468127	297143406	365219204	0.94
DF-17-132	DF-17-132_Cecal_met_F_T	Tumor	0.88	429.09	249.3	474873506	467179384	377814714	370120592	463469674	0.95
DF-17-132	DF-17-132_WB_N	Normal	0	156.55	101.56	196333360	192878955	174306248	170851843	191564082	0.94
DF-17-134	DF-17-134_right_ovary_C_T	Tumor	3.08	487.63	267.99	508616398	500106392	384708946	376198940	496228466	0.95
DF-17-134	DF-17-134_left_ovary_mass_C_T	Tumor	3.88	321.68	186.28	316812980	311144423	258838923	253170366	307921530	0.92
DF-17-134	DF-17-134_right_ovary_F_T	Tumor	3.69	371.69	208.17	355169224	349072814	287916858	281820448	346083398	0.92
DF-17-134	DF-17-134_Left_ovary_mass_F_T	Tumor	0.47	501.62	284.39	510251532	501770087	402726735	394245290	496992192	0.95
DF-17-134	DF-17-134_uterus_FFPE_N	Normal	0	418.51	225.9	454892754	440782092	352128281	338017619	433803018	0.93
DF-17-39	DF-17-39-Rectosig_F_T	Tumor	3.61	579.85	314	623567226	614695160	464769790	455897724	610179782	0.95
DF-17-39	DF-17-39-transcol_F_T	Tumor	5.81	684.55	352.83	718049858	707726275	499417614	489094031	702324274	0.96
DF-17-39	DF-17-39-supcoloment_F_T	Tumor	2.99	324.8	180.53	325942312	317382063	256308334	247748085	312655518	0.91
DF-17-39	DF-17-39-diaph_F_T	Tumor	5.76	486.72	272.24	584678666	573993700	437374629	426689663	567486766	0.95
DF-17-39	DF-17-39-Rectosig_C_T	Tumor	3.38	540.81	281.52	585441640	575712998	404869047	395140405	569762360	0.95
DF-17-39	DF-17-39-transcol_C_T	Tumor	0.74	499.61	251.24	525895844	517976105	367753681	359833942	513784758	0.94
DF-17-39	DF-17-39-supcoloment_C_T	Tumor	0.82	336.57	149.38	340951832	336080150	211340689	206469007	333171028	0.88
DF-17-39	DF-17-39-diaph_C_T	Tumor	0.55	506.02	260.64	526615472	519136200	378474400	370995128	515089308	0.94
DF-17-39	DF-17-39-2015ovary_FFPE_T	Tumor	0.11	581.95	248.64	533654000	514385218	350579581	331310799	504646302	0.93
DF-17-39	DF-17-39_WB_N	Normal	0	162.13	98.69	215024130	210382847	183068659	178427376	207773428	0.95
DF-18-1	DF-18-1_Omentum_C_T	Tumor	3.42	216.83	135.91	242194258	236577974	212068005	206451721	233809312	0.87
DF-18-1	DF-18-1_Omentum_F_T	Tumor	3	227.85	141.09	240010428	235776353	210814039	206579964	234003084	0.85
DF-18-1	DF-18-1_WB_N	Normal	0.08	126.44	78.81	154081596	151561840	135013377	132493621	150705840	0.93
DF-18-12	DF-18-12-Left-ovary_F_T	Tumor	1.65	306.11	173.35	308056162	302934654	244214859	239093351	300408890	0.87
DF-18-12	DF-18-12-Left-ovary_C_T	Tumor	0.65	276.26	147.51	263562638	257422198	198384951	192244511	254141598	0.81
DF-18-12	DF-18-12-Uterus_FFPE_N	Normal	0.3	205.29	96.93	215319000	185968443	163652701	134302144	170175120	0.72
DF-18-17	DF-18-17-Omentum_C_T	Tumor	0.23	303.36	172.22	340615744	335146668	272891364	267422288	332368120	0.91
DF-18-17	DF-18-17-blood_N	Normal	0	154.54	91.94	170050358	167878662	140956140	138784444	167041302	0.93
DF-18-23	DF-18-23-Right-ovary_F_T	Tumor	4.86	311.13	177.49	340170934	334785539	274331454	268946059	332108444	0.89
DF-18-23	DF-18-23-Right-ovary_C_T	Tumor	4.47	217.3	119.55	213049960	207889928	170306533	165146501	205149604	0.79
DF-18-23	DF-18-23-blood_N	Normal	0	193.44	112.23	214597008	211751661	173295727	170450380	210657662	0.94
DF-18-30	DF-18-30-Left-ovary_F_T	Tumor	3.52	296.58	168.48	292062418	286680348	232369232	226987162	283775834	0.87
DF-18-30	DF-18-30-Left-ovary_C_T	Tumor	3.87	287.03	160.43	290995802	286069347	227246322	222319867	283372990	0.88
DF-18-30	DF-18-30-blood_N	Normal	0	153.92	92.6	163775010	161874626	138017730	136117346	161130576	0.93
DF-18-43	DF-18-43-Left-ovary_F_T	Tumor	0.05	381.31	211.28	379953140	374453937	295044038	289544835	371507844	0.92
DF-18-43	DF-18-43-Omentum_F_T	Tumor	0.14	286.32	161.67	291546134	285991188	231739318	226184372	283161058	0.87
DF-18-43	DF-18-43-Left-ovary_C_T	Tumor	0	305.42	168.49	317925312	312178074	250688390	244941152	309452678	0.91
DF-18-43	DF-18-43-Omentum_C_T	Tumor	0.11	278.77	158.49	279334264	275154015	219458986	215278737	272825570	0.9
DF-18-43	DF-18-43-Uterus_FFPE_N	Normal	0.94	107.17	49.34	123162638	99988982	97543409	74369753	87687568	0.4
DF-18-47	DF-18-47--Omentum_F_T	Tumor	0.07	276.4	149.54	264410700	256681452	200408922	192679674	252080730	0.86
DF-18-47	DF-18-47--Omentum_C_T	Tumor	0	312.21	172.93	297014116	292402996	231279858	226668738	289899578	0.91
DF-18-47	DF-18-47-gastric_FFPE_N	Normal	0.23	253.25	100.05	186819710	180587129	129412741	123180160	177898650	0.74
DF-18-48	DF-18-48-Omentum_F_T	Tumor	0	350.99	189.92	355060114	349546285	266468054	260954225	346612250	0.92
DF-18-48	DF-18-48-Omentum_C_T	Tumor	0.98	304.9	164.74	306925386	301985580	235827124	230887318	299525554	0.9
DF-18-48	DF-18-48-blood_N	Normal	0	161.32	95.34	170142674	167631553	140871445	138360324	166608804	0.93
DF-18-50	DF-18-50-Omentum_F_T	Tumor	0.01	295.38	163.57	296645426	292264135	231898188	227516897	290032700	0.9
DF-18-50	DF-18-50-Omentum_C_T	Tumor	2.45	251.89	137.9	228690844	223667347	176481402	171457905	220858596	0.85
DF-18-50	DF-18-50-blood_N	Normal	0.02	209.79	125.17	251674274	248046071	206222095	202593892	246645944	0.95
DF-18-54	DF-18-54-Omentum_F_T	Tumor	0.79	418.16	226.81	421254170	415132720	320360753	314239303	411908580	0.92
DF-18-54	DF-18-54-Omentum_C_T	Tumor	0.26	271.39	149.64	263729122	259515151	204096655	199882684	257135466	0.89
DF-18-54	DF-18-54-blood_N	Normal	0.27	134.4	81.36	146728768	144738334	123978908	121988474	143928526	0.92
DF-18-7	DF-18-7-Right-ovary_F_T	Tumor	0.09	318.72	183.5	324014068	319508576	257888381	253382889	317161880	0.9
DF-18-7	DF-18-7-Right-ovary_C_T	Tumor	0.18	364.48	194.23	383736530	376562377	293043924	285869771	373194674	0.92
DF-18-7	DF-18-7-Uterus_FFPE_N	Normal	0.75	136.74	60.56	147230828	121318415	114204007	88291594	107637914	0.5
DF-18-8	DF-18-8-Colon_F_T	Tumor	4.64	319.13	179.73	326743756	321997820	263462300	258716364	319606300	0.89
DF-18-8	DF-18-8-Colon_C_T	Tumor	4.86	311.39	168.23	297234402	292485476	225870134	221121208	289578670	0.88
DF-18-8	DF-18-8-blood_N	Normal	0	175.55	107.57	202438648	199941755	168956183	166459290	198828110	0.94
