# Supplementary material for: Prediction of DNA Repair Inhibitor Response in Short-Term Patient-Derived Ovarian Cancer Organoids
Source: Oxford University Press journal article supplement (doi:10.1158/2159-8290.cd-18-0474), 2018-09-13
Supplement: 21598290cd180474-sup-201018_2_supp_4992275_pmj5hm.xlsx [file 21598290cd180474-sup-201018_2_supp_4992275_pmj5hm.xlsx]

## Sheet: Sheet1
Supplementary Table S4. Clinical outcome data.
Patients who were untreated at time of tissue harvest for organoid generation
Patient	Histology	Known germline mutation	Copy Number Alteration	Procedure at which tissue was obtained for organoid generation	Organoid	Organoid drug responses				Organoid HU Fibers	Organoid RAD51 Foci	Patient response to initial systemic treatment after procedure during which organoids were generated
						Carboplatin	Olaparib	Prexasertib	VE-822
DF-17-115	HGSC	BRCA2	None	Debulking	DF-17-115 Left Ovary	S	R	S	S	U	Not done	Completed adjuvant carboplatin/abraxane based chemotherapy six months after debulking. Deemed platinum sensitive, now with stable disease.
DF-17-123	HGSC	None	Myc amplified	Debulking	DF-17-123 Right ovary	R	R	R	R	U	Yes	Three cycles of adjuvant cisplatin/paclitaxel, completed three months after debulking, now with stable disease and deemed platinum sensitive.
					DF-17-123 Left ovary	R	R	S	S	U	Yes
					DF-17-123 Omentum	S	R	R	R	U	Yes
DF-17-126	HGSC	RAD51C	None	Debulking	DF-17-126 Omentum	S	S	S	S	U	No	Completed six cycles of carboplatin/paclitaxel six months after debulking. Now with stable disease and deemed platinum sensitive.
DF-17-134	HGSC	None	None	Debulking	DF-17-134 Left ovary	S	R	R	R	St	Yes	Treated with five cycles adjuvant IP/IV cisplatin/paclitaxel and one cycle carboplatin/paclitaxel with last cycle five months after debulking, now with increasing CA125 and imaging concerning for possible recurrence.
					DF-17-134 Right ovary	R	R	S	S	St	Yes
DF-17-132	HGSC	None	None	Aborted debulking attempt of untreated disease	DF-17-132 #1-Omentum	R	R	R	R	N	Yes	Refractory to neoadjuvant carboplatin/paclitaxel therapy, debulking attempted, see DF-17-132 #2 and DF-17-132 #3
				Interval debulking post neoadjuvant chemotherapy five months after first attempt	DF-17-132 #2-Omentum	R	R	R	R	St	Yes	Additional two cycles of carboplatin/paclitaxel completed two months after interval debulk, with a stable CA125 and best response of stable disease
				Interval debulking post neoadjuvant chemotherapy five months after first attempt	DF-17-132 #3-Cecal mesentery	R	R	R	R	St	Yes	Additional two cycles of carboplatin/paclitaxel completed two months after interval debulk, with a stable CA125 and best response of stable disease
DF-18-7	HGSC	None	None	Debulking	DF-18-7 Right ovary	R	R	R	R	U	Yes	Completed six cycles of adjuvant carboplatin/paclitaxel five months after debulking with currently stable disease
DF-18-8	HGSC	None	Myc amplified	Debulking	DF-18-8 Colonic mesentery	S	R	S	S	U	Not done	Completed six cycles of adjuvant carboplatin/paclitaxel five months after debulking with currently stable disease
DF-18-12	HGSC	None	CCNE1 amplified	Debulking	DF-18-12 Left ovary	R	R	R	R	Not done	Yes	Adjuvant carboplatin/paclitaxel chemotherapy completed five months after debulking with stable disease.
DF-18-30	Carcinosarcoma, with an HGSC epithelial component and spindle cell mesenchymal component	BRCA2	Myc amplified	Debulking	DF-18-30 Left ovary	S	S	R	S	U	No	Status post four cycles of adjuvant carboplatin/paclitaxel and continuing on treatment with the addition of Avastin. Patient is responding with a continued drop in CA125.
DF-18-47	HGSC	None	CCNE1 amplified	Laparoscopic biopsy	DF-18-47 Omentum	S	R	S	S	U	Yes	Excellent response to three cyles of neoadjuvant carboplatin/paclitaxel, only microscopic residual disease, not enough tumor to generate organoids. Continuing on adjuvant carboplatin/paclitaxel.
				Interval debulking post two months of neoadjuvant chemo	No organoids generated	Not done	Not done	Not done	Not done	Not done	Not done
Patients who were status post neoadjuvant chemotherapy at time of tissue harvest for organoid generation
Patient	Histology	Known germline mutation	Copy number alteration	Procedure at which tissue was obtained for organoid generation	Organoid	Organoid drug responses				Organoid HU Fibers	Organoid RAD51 Foci	Clinical response to neoadjuvant chemotherapy	Patient response to adjuvant chemotherapy and current status
						Carboplatin	Olaparib	Prexasertib	VE-822
DF-17-103	HGSC	None	None	Interval debulking post neoadjuvant chemo	DF-17-103 Omentum	R	R	R	S	St	Yes	Partial response to three cycles of neoadjuvant carboplatin/paclitaxel.	Status post three cycles of adjuvant carboplatin/paclitaxel, now with stable disease
DF-17-104	HGSC	None	None	Interval debulking post neoadjuvant chemo	DF-17-104 Omentum	S	R	S	R	U	Not done	Partial response to neoadjuvant carboplatin/paclitaxel.	Underwent six cycles of adjuvant carboplatin/paclitaxel with currently stable disease, deemed platinum sensitive.
DF-17-107	HGSC	BRCA1	Myc amplified	Interval debulking post neoadjuvant chemo	DF-17-107 Left ovary	R	R	R	R	St	Yes	Partial response to neoadjuvant carboplatin/paclitaxel.	Underwent eight cycles of adjuvant carboplatin/paclitaxel with currently stable disease.
					DF-17-107 Right ovary	R	R	S	R	N	Yes
					DF-17-107 Omentum	R	R	R	R	N	Not done
DF-17-116	HGSC	None	None	Aborted debulking post neoadjuvant chemo	DF-17-116 Omentum	S	R	S	S	U	Yes	Partial response to three cycles of carboplatin/paclitaxel with rapid recurrence suggesting a platinum refractory clone	Progressed on carboplatin/gemcitabine, followed by progression on olaparib/cediranib, followed by worsening symptoms and pleural effusion on doxil. Patient passed away nine months after aborted debulking due to complications of ovarian cancer.
DF-18-1	HGSC	None	CCNE1 amplified	Interval debulking post neoadjuvant chemo	DF-18-1 Omentum	R	R	R	R	St	Yes	Poor response to neoadjuvant carboplatin/paclitaxel.	Underwent six cycles of neoadjuvant carboplatin/paclitaxel completed 1.5 months after interval debulk with persistent disease by PET/CT two months after interval debulk, followed by carboplatin/gemcitabine, with continued persistent disease by PET/CT and biopsy five months after interval debulk, now initiating doxil.
DF-18-17	HGSC	None	None	Interval debulking post neoadjuvant chemo	DF-18-17 Omentum	R	R	R	R	R	Yes	Partial response to neoadjuvant platinum/paclitaxel.	No further follow up available.
DF-18-23	HGSC	BRCA2	Myc amplified	Interval debulking post neoadjuvant chemo	DF-18-23 Right ovary	R	R	R	R	U	No	Partial response to neoadjuvant carboplatin/paclitaxel which was completed 8 months prior to the procedure at which tissue was obtained with disease progression noted by imaging one month prior to the procedure at which tissue was obtained.	Declined adjuvant chemotherapy, limited follow up.
DF-18-43	HGSC	None	None	Interval debulking post neoadjuvant chemo	DF-18-43 Omentum	R	R	R	R	Not done	Not done	Partial response to four cycles neoadjuvant carboplatin/paclitaxel.	No further follow up available.
					DF-18-43 Left ovary	R	R	R	R	St	Yes
DF-18-48	LGSC	None	None	Interval debulking post neoadjuvant chemo	DF-18-48 Omentum	R	R	S	S	St	Yes	Partial response to neoadjuvant chemotherapy.	Status post three cycles of adjuvant carboplatin/paclitaxel with stable disease. Will continue on Arimidex.
DF-18-50	HGSC	None	CCNE1 amplified	Interval debulking post neoadjuvant chemo	DF-18-50 Omentum	S	R	S	S	U	Yes	Partial response to neoadjuvant carboplatin/paclitaxel.	Status post adjuvant carboplatin/paclitaxel with an increase in CA125 and persistent disease or mild disease progression on imaging two months after interval debulking, followed by initiation of cisplatin/gemcitabine.
DF-18-54	HGSC	None	None	Interval debulking post neoadjuvant chemo	DF-18-54 Omentum	R	R	R	R	Not done	Yes	Partial response to neoadjuvant carboplatin/paclitaxel.	Continuing on adjuvant carboplatin/paclitaxel.
Patients who had significant prior therapy
Patient	Histology	Known germline mutation	Copy Number alteration	Procedure at which tissue was obtained for organoid generation	Organoid	Organoid drug responses				Organoid HU Fibers	Organoid RAD51 Foci	Clinical response to chemotherapy	Current status
						Carboplatin	Olaparib	Prexasertib	VE-822
DF-17-39	HGSC	BRCA1	Myc amplified	Second debulking after initial neoadjuvant carboplatin/paclitaxel and primary debulk, followed by adjuvant carboplatin/paclitaxel, followed by olaparib/cediranib treatment at the time of her first recurrence	DF-17-39 Rectosigmoid	S	R	S	S	U	Yes	No response to adjuvant niraparib, followed by no response to adjuvant paclitaxel, followed by stable disease apart from a liver metastasis on combined prexasertib/olaparib, followed by significant response to carboplatin/gemcitabine for 6 months.	Recurrence after significant stability on carboplatin/gemcitabine, attempted two cycles doxil and transitioned to palliative care. Patient passed away due to complication of ovarian cancer.
					DF-17-39 Transverse colon	S	R	S	S	U	Yes
					DF-17-39 Supracolic omentum	S	R	S	S	U	Yes
					DF-17-39 Diaphragm	S	R	S	S	U	Yes
DF-17-121	HGSC	None	None	Therapeutic thoracentesis for recurrent pleural effusion	DF-17-121 Pleural effusion	R	R	R	R	St	Yes	Resistant to ATR inhibitor	Progressed on olaparib/cediranib clinical trial and recently stopped trial. Cediranib is thought to induce an HR defect and enhance olaparib sensitivity.
