# Supplementary material for: Prediction of DNA Repair Inhibitor Response in Short-Term Patient-Derived Ovarian Cancer Organoids
Source: Oxford University Press journal article supplement (doi:10.1158/2159-8290.cd-18-0474), 2018-09-13
Supplement: 21598290cd180474-sup-201018_2_supp_4992276_py5yy3.xlsx [file 21598290cd180474-sup-201018_2_supp_4992276_py5yy3.xlsx]

## Sheet: MUTATION_SIGNATURE_METRICS
Supplementary Table S5. Number and characteristics of SNVs and indels found in each tumor-organoid pair.
Tumor-Organoid Pair	Indels	Dels	Insertions	Indels per Mb	Dels per Mb	Insertions per Mb	Del:Ins Ratio	Long Dels (>=5-bp)	Long Del Pct	SNVs	SNVs per Mb	C>A	C>G	C>T	T>A	T>C	T>G	C>T Pct	C>T per Mb
DF-17-103_Omentum	14	8	6	0.368421	0.210526	0.157895	1.33333	0	0	62	1.63158	17	18	14	6	4	3	0.225806	0.368421
DF-17-104_omentum	60	43	17	1.57895	1.13158	0.447368	2.52941	26	0.604651	140	3.68421	31	20	80	0	7	2	0.571429	2.10526
DF-17-107_left_ovary	39	28	11	1.02632	0.736842	0.289474	2.54545	22	0.785714	75	1.97368	12	10	35	2	14	2	0.466667	0.921053
DF-17-107_omentum	68	44	24	1.78947	1.15789	0.631579	1.83333	34	0.772727	92	2.42105	19	17	32	0	18	6	0.347826	0.842105
DF-17-107_right_ovary	26	22	4	0.684211	0.578947	0.105263	5.5	10	0.454545	142	3.73684	21	32	48	19	20	2	0.338028	1.26316
DF-17-115_Left_ovarian_mass	119	89	30	3.13158	2.34211	0.789474	2.96667	43	0.483146	209	5.5	38	37	63	24	31	16	0.301435	1.65789
DF-17-116_omental_met	64	48	16	1.68421	1.26316	0.421053	3	28	0.583333	30	0.789474	2	4	16	0	0	8	0.533333	0.421053
DF-17-121_pleural_effusion	80	60	20	2.10526	1.57895	0.526316	3	34	0.566667	85	2.23684	12	23	37	1	12	0	0.435294	0.973684
DF-17-123_Left_ovary	18	17	1	0.473684	0.447368	0.0263158	17	8	0.470588	237	6.23684	34	48	87	19	26	23	0.367089	2.28947
DF-17-123_Omentum	11	10	1	0.289474	0.263158	0.0263158	10	4	0.4	251	6.60526	54	63	68	30	16	20	0.270916	1.78947
DF-17-123_Right_ovary	16	16	0	0.421053	0.421053	0	16	4	0.25	173	4.55263	38	17	84	8	18	8	0.485549	2.21053
DF-17-126_omental_metastasis	154	124	30	4.05263	3.26316	0.789474	4.13333	82	0.66129	325	8.55263	80	54	106	18	39	28	0.326154	2.78947
DF-17-132_Cecal_met	22	16	6	0.578947	0.421053	0.157895	2.66667	14	0.875	90	2.36842	15	12	50	0	10	3	0.555556	1.31579
DF-17-132_omentum	16	10	6	0.421053	0.263158	0.157895	1.66667	10	1	304	8	51	74	91	23	45	20	0.299342	2.39474
DF-17-134_left_ovary_mass	16	8	8	0.421053	0.210526	0.210526	1	4	0.5	230	6.05263	41	42	68	26	33	20	0.295652	1.78947
DF-17-134_right_ovary	16	8	8	0.421053	0.210526	0.210526	1	4	0.5	473	12.4474	90	103	135	45	62	38	0.285412	3.55263
DF-17-39-2015ovary	8	6	2	0.210526	0.157895	0.0526316	3	4	0.666667	236	6.21053	49	53	76	20	22	16	0.322034	2
DF-17-39-diaph	91	62	29	2.39474	1.63158	0.763158	2.13793	46	0.741935	229	6.02632	49	57	72	17	18	16	0.31441	1.89474
DF-17-39-Rectosig	123	94	29	3.23684	2.47368	0.763158	3.24138	56	0.595745	249	6.55263	64	55	70	23	19	18	0.281124	1.84211
DF-17-39-supcolomen	40	30	10	1.05263	0.789474	0.263158	3	24	0.8	103	2.71053	12	12	62	4	13	0	0.601942	1.63158
DF-17-39-transcol	100	75	25	2.63158	1.97368	0.657895	3	41	0.546667	219	5.76316	54	53	60	18	17	17	0.273973	1.57895
DF-18-1_Omentum	22	14	8	0.578947	0.368421	0.210526	1.75	10	0.714286	181	4.76316	24	26	84	7	32	8	0.464088	2.21053
DF-18-12-Left-ovary	51	41	10	1.34211	1.07895	0.263158	4.1	20	0.487805	475	12.5	98	105	125	39	64	44	0.263158	3.28947
DF-18-17-Omentum	3	3	0	0.0789474	0.0789474	0	3	1	0.333333	132	3.47368	23	12	75	10	6	6	0.568182	1.97368
DF-18-23-Right-ovary	69	60	9	1.81579	1.57895	0.236842	6.66667	36	0.6	152	4	21	36	50	22	19	4	0.328947	1.31579
DF-18-30-Left-ovary	62	52	10	1.63158	1.36842	0.263158	5.2	38	0.730769	133	3.5	17	31	43	20	19	3	0.323308	1.13158
DF-18-43-Left-ovary	74	50	24	1.94737	1.31579	0.631579	2.08333	30	0.6	108	2.84211	14	14	58	4	18	0	0.537037	1.52632
DF-18-43-Omentum	66	54	12	1.73684	1.42105	0.315789	4.5	38	0.703704	174	4.57895	38	37	50	17	19	13	0.287356	1.31579
DF-18-47--Omentum	34	20	14	0.894737	0.526316	0.368421	1.42857	8	0.4	30	0.789474	8	2	13	1	3	3	0.433333	0.342105
DF-18-48-Omentum	12	10	2	0.315789	0.263158	0.0526316	5	6	0.6	58	1.52632	8	14	22	6	8	0	0.37931	0.578947
DF-18-50-Omentum	8	6	2	0.210526	0.157895	0.0526316	3	6	1	74	1.94737	12	2	35	12	11	2	0.472973	0.921053
DF-18-54-Omentum	39	30	9	1.02632	0.789474	0.236842	3.33333	10	0.333333	46	1.21053	10	2	30	0	4	0	0.652174	0.789474
DF-18-7-Right-ovary	113	91	22	2.97368	2.39474	0.578947	4.13636	59	0.648352	107	2.81579	23	12	40	0	24	8	0.373832	1.05263
DF-18-8-Colon	34	30	4	0.894737	0.789474	0.105263	7.5	24	0.8	34	0.894737	8	2	20	0	4	0	0.588235	0.526316
